# Supplementary material for: Projecting the risk of damage to reef-lined coasts due to intensified tropical cyclones and sea level rise in Palau to 2100
Source: Copernicus journal article supplement (doi:10.5194/nhess-2017-3), 2017-03-16
Supplement: Supplementary file 1 [file nhess-2017-3-supplement.pdf]

Table S1 Effects of intensification of tropical cyclones, and increased sea level rise and storm surges on wave height on the reef flat at the study site.

| Case                                                  | SWH <sub>o</sub> (m) | SWP <sub>o</sub> (s) | SLR (m) | Tide relative to present MSL (m) | Storm surge (m) | SWH <sub>r</sub> at degraded reef (m) | Effect of increasing of intensity of tropical cyclone to SWH <sub>r</sub> at degraded reef (%)* | SWH <sub>r</sub> at healthy reef (m) | Effect of increasing of intensity of tropical cyclone to SWH <sub>r</sub> at healthy reef (%)* |
|-------------------------------------------------------|----------------------|----------------------|---------|----------------------------------|-----------------|---------------------------------------|-------------------------------------------------------------------------------------------------|--------------------------------------|------------------------------------------------------------------------------------------------|
| Effect of increasing of intensity of tropical cyclone |                      |                      |         |                                  |                 |                                       |                                                                                                 |                                      |                                                                                                |
| 3                                                     | 8.70                 | 13.0                 | 0.24    | 0.80                             | 0.00            | <b>1.11</b>                           |                                                                                                 | <b>0.88</b>                          |                                                                                                |
| 7                                                     | 10.0                 | 14.0                 |         |                                  |                 | 1.45                                  | 30.6%                                                                                           | 1.21                                 | 37.5%                                                                                          |
| 11                                                    | 11.0                 | 15.0                 |         |                                  |                 | 1.31                                  | 18.0%                                                                                           | 1.49                                 | 69.3%                                                                                          |
| 4                                                     | 8.70                 | 13.0                 | 0.24    | 0.80                             | 1.00            | <b>1.37</b>                           |                                                                                                 | <b>1.22</b>                          |                                                                                                |
| 8                                                     | 10.0                 | 14.0                 |         |                                  |                 | 1.57                                  | 14.6%                                                                                           | 1.52                                 | 24.6%                                                                                          |
| 12                                                    | 11.0                 | 15.0                 |         |                                  |                 | 1.93                                  | 40.9%                                                                                           | 1.66                                 | 36.1%                                                                                          |
| 5                                                     | 8.70                 | 13.0                 | 0.30    | 0.80                             | 0.00            | <b>0.97</b>                           |                                                                                                 | <b>1.09</b>                          |                                                                                                |
| 9                                                     | 10.0                 | 14.0                 |         |                                  |                 | 1.51                                  | 55.7%                                                                                           | 1.46                                 | 33.9%                                                                                          |
| 13                                                    | 11.0                 | 15.0                 |         |                                  |                 | 1.53                                  | 57.7%                                                                                           | 1.50                                 | 37.6%                                                                                          |
| 6                                                     | 8.70                 | 13.0                 | 0.30    | 0.80                             | 1.00            | <b>1.33</b>                           |                                                                                                 | <b>1.35</b>                          |                                                                                                |
| 10                                                    | 10.0                 | 14.0                 |         |                                  |                 | 1.67                                  | 25.6%                                                                                           | 1.26                                 | -6.7%                                                                                          |
| 14                                                    | 11.0                 | 15.0                 |         |                                  |                 | 2.14                                  | 60.9%                                                                                           | 1.70                                 | 25.9%                                                                                          |
| 15                                                    | 8.70                 | 13.0                 | 0.44    | 0.80                             | 0.00            | <b>1.07</b>                           |                                                                                                 | <b>1.06</b>                          |                                                                                                |
| 21                                                    | 10.0                 | 14.0                 |         |                                  |                 | 1.54                                  | 43.9%                                                                                           | 1.33                                 | 25.5%                                                                                          |
| 25                                                    | 11.0                 | 15.0                 |         |                                  |                 | 1.63                                  | 52.3%                                                                                           | 1.40                                 | 32.1%                                                                                          |
| 16                                                    | 8.70                 | 13.0                 | 0.44    | 0.80                             | 1.00            | <b>1.32</b>                           |                                                                                                 | <b>1.21</b>                          |                                                                                                |
| 22                                                    | 10.0                 | 14.0                 |         |                                  |                 | 1.87                                  | 41.7%                                                                                           | 1.45                                 | 19.8%                                                                                          |
| 26                                                    | 11.0                 | 15.0                 |         |                                  |                 | 1.97                                  | 49.2%                                                                                           | 1.77                                 | 46.3%                                                                                          |
| 17                                                    | 8.70                 | 13.0                 | 0.74    | 0.80                             | 0.00            | <b>1.34</b>                           |                                                                                                 | <b>1.11</b>                          |                                                                                                |
| 23                                                    | 10.0                 | 14.0                 |         |                                  |                 | 1.48                                  | 10.4%                                                                                           | 1.18                                 | 6.3%                                                                                           |
| 27                                                    | 11.0                 | 15.0                 |         |                                  |                 | 1.68                                  | 25.4%                                                                                           | 1.77                                 | 59.5%                                                                                          |
| 18                                                    | 8.70                 | 13.0                 | 0.74    | 0.80                             | 1.00            | <b>1.24</b>                           |                                                                                                 | <b>1.40</b>                          |                                                                                                |
| 24                                                    | 10.0                 | 14.0                 |         |                                  |                 | 1.59                                  | 28.2%                                                                                           | 1.64                                 | 17.1%                                                                                          |
| 28                                                    | 11.0                 | 15.0                 |         |                                  |                 | 1.92                                  | 54.8%                                                                                           | 1.66                                 | 18.6%                                                                                          |
| 20                                                    | 8.70                 | 13.0                 | 0.98    | 0.80                             | 1.00            | <b>1.47</b>                           |                                                                                                 | <b>1.30</b>                          |                                                                                                |
| 29                                                    | 11.0                 | 15.0                 |         |                                  |                 | 2.00                                  | 36.1%                                                                                           | 1.80                                 | 38%                                                                                            |
|                                                       |                      |                      |         |                                  |                 | Mean                                  | 38.0%                                                                                           | Mean                                 | 30.7%                                                                                          |
|                                                       |                      |                      |         |                                  |                 | SD                                    | 16.0%                                                                                           | SD                                   | 18.2%                                                                                          |
| Effect of sea level rise                              |                      |                      |         |                                  |                 |                                       |                                                                                                 |                                      |                                                                                                |
| 1                                                     | 8.70                 | 13.0                 | 0.00    | 0.80                             | 0.00            | -                                     |                                                                                                 | <b>1.05</b>                          |                                                                                                |
| 3                                                     |                      |                      | 0.24    |                                  |                 | <b>1.11</b>                           |                                                                                                 | 0.88                                 | -16.2%                                                                                         |
| 5                                                     |                      |                      | 0.30    |                                  |                 | 0.97                                  | -12.6%                                                                                          | 1.09                                 | 3.8%                                                                                           |
| 15                                                    |                      |                      | 0.44    |                                  |                 | 1.07                                  | -3.6%                                                                                           | 1.06                                 | 1.0%                                                                                           |
| 17                                                    |                      |                      | 0.74    |                                  |                 | 1.34                                  | 20.7%                                                                                           | 1.11                                 | 5.7%                                                                                           |
| 19                                                    |                      |                      | 0.98    |                                  |                 | 1.28                                  | 15.3%                                                                                           | 1.12                                 | 6.7%                                                                                           |
| 2                                                     | 8.70                 | 13.0                 | 0.00    | 0.80                             | 1.00            | -                                     |                                                                                                 | <b>1.24</b>                          |                                                                                                |
| 4                                                     |                      |                      | 0.24    |                                  |                 | <b>1.37</b>                           |                                                                                                 | 1.22                                 | -1.6%                                                                                          |
| 6                                                     |                      |                      | 0.30    |                                  |                 | 1.33                                  | -2.9%                                                                                           | 1.35                                 | 8.9%                                                                                           |
| 16                                                    |                      |                      | 0.44    |                                  |                 | 1.32                                  | -3.6%                                                                                           | 1.21                                 | -2.4%                                                                                          |
| 18                                                    |                      |                      | 0.74    |                                  |                 | 1.24                                  | -9.5%                                                                                           | 1.40                                 | 12.9%                                                                                          |
| 20                                                    |                      |                      | 0.98    |                                  |                 | 1.47                                  | 7.3%                                                                                            | 1.30                                 | 4.8%                                                                                           |
| 7                                                     | 10.0                 | 14.0                 | 0.24    | 0.80                             | 0.00            | <b>1.45</b>                           |                                                                                                 | <b>1.21</b>                          |                                                                                                |
| 9                                                     |                      |                      | 0.30    |                                  |                 | 1.51                                  | 4.1%                                                                                            | 1.46                                 | 20.7%                                                                                          |
| 21                                                    |                      |                      | 0.44    |                                  |                 | 1.54                                  | 6.2%                                                                                            | 1.33                                 | 9.9%                                                                                           |
| 23                                                    |                      |                      | 0.74    |                                  |                 | 1.48                                  | 2.1%                                                                                            | 1.18                                 | -2.5%                                                                                          |
| 8                                                     | 10.0                 | 14.0                 | 0.24    | 0.80                             | 1.00            | <b>1.57</b>                           |                                                                                                 | <b>1.52</b>                          |                                                                                                |
| 10                                                    |                      |                      | 0.30    |                                  |                 | 1.67                                  | 6.4%                                                                                            | 1.26                                 | -17.1%                                                                                         |
| 22                                                    |                      |                      | 0.44    |                                  |                 | 1.87                                  | 19.1%                                                                                           | 1.45                                 | -4.6%                                                                                          |
| 24                                                    |                      |                      | 0.74    |                                  |                 | 1.59                                  | 1.3%                                                                                            | 1.64                                 | 7.9%                                                                                           |

|    |      |      |      |      |      |             |       |             |       |
|----|------|------|------|------|------|-------------|-------|-------------|-------|
| 11 | 11.0 | 15.0 | 0.24 | 0.80 | 0.00 | <b>1.31</b> |       | <b>1.49</b> |       |
| 13 |      |      | 0.30 |      |      | 1.53        | 16.8% | 1.50        | 0.7%  |
| 25 |      |      | 0.44 |      |      | 1.63        | 24.4% | 1.40        | -6.0% |
| 27 |      |      | 0.74 |      |      | 1.68        | 28.2% | 1.77        | 18.8% |
| 12 | 11.0 | 15.0 | 0.24 | 0.80 | 1.00 | <b>1.93</b> |       | <b>1.66</b> |       |
| 14 |      |      | 0.30 |      |      | 2.14        | 10.9% | 1.70        | 2.4%  |
| 26 |      |      | 0.44 |      |      | 1.97        | 2.1%  | 1.77        | 6.6%  |
| 28 |      |      | 0.74 |      |      | 1.92        | -0.5% | 1.66        | 0.0%  |
| 29 |      |      | 0.98 |      |      | 2.00        | 3.6%  | 1.80        | 8.4%  |
|    |      |      |      |      |      | Mean        | 6.5%  | Mean        | 3.0%  |
|    |      |      |      |      |      | SD          | 11.0% | SD          | 9.2%  |

| Case                  | SWH <sub>o</sub> (m) | SWP <sub>o</sub> (s) | SLR (m) | Tide relative to present MSL (m) | Storm surge (m) | SWH <sub>r</sub> at degraded reef (m) | Effect of storm surge to SWH <sub>r</sub> at degraded reef (%)* | SWH <sub>r</sub> at healthy reef (m) | Effect of storm surge to SWH <sub>r</sub> at healthy reef (%)* |
|-----------------------|----------------------|----------------------|---------|----------------------------------|-----------------|---------------------------------------|-----------------------------------------------------------------|--------------------------------------|----------------------------------------------------------------|
| Effect of storm surge |                      |                      |         |                                  |                 |                                       |                                                                 |                                      |                                                                |
| 1                     | 8.70                 | 13.0                 | 0.00    | 0.80                             | 0.00            | -                                     |                                                                 | <b>1.05</b>                          |                                                                |
| 2                     |                      |                      |         |                                  | 1.00            | -                                     |                                                                 | 1.24                                 | 18.1%                                                          |
| 3                     | 8.70                 | 13.0                 | 0.24    | 0.80                             | 0.00            | <b>1.11</b>                           |                                                                 | <b>0.88</b>                          |                                                                |
| 4                     |                      |                      |         |                                  | 1.00            | 1.37                                  | 23.4%                                                           | 1.22                                 | 38.6%                                                          |
| 5                     | 8.70                 | 13.0                 | 0.30    | 0.80                             | 0.00            | <b>0.97</b>                           |                                                                 | <b>1.09</b>                          |                                                                |
| 6                     |                      |                      |         |                                  | 1.00            | 1.33                                  | 37.1%                                                           | 1.35                                 | 23.9%                                                          |
| 7                     | 10.0                 | 14.0                 | 0.24    | 0.80                             | 0.00            | <b>1.45</b>                           |                                                                 | <b>1.21</b>                          |                                                                |
| 8                     |                      |                      |         |                                  | 1.00            | 1.57                                  | 8.3%                                                            | 1.52                                 | 25.6%                                                          |
| 9                     | 10.0                 | 14.0                 | 0.30    | 0.80                             | 0.00            | <b>1.51</b>                           |                                                                 | <b>1.46</b>                          |                                                                |
| 10                    |                      |                      |         |                                  | 1.00            | 1.67                                  | 10.6%                                                           | 1.26                                 | -13.7%                                                         |
| 11                    | 11.0                 | 15.0                 | 0.24    | 0.80                             | 0.00            | <b>1.31</b>                           |                                                                 | <b>1.49</b>                          |                                                                |
| 12                    |                      |                      |         |                                  | 1.00            | 1.93                                  | 47.3%                                                           | 1.66                                 | 11.4%                                                          |
| 13                    | 11.0                 | 15.0                 | 0.30    | 0.80                             | 0.00            | <b>1.53</b>                           |                                                                 | <b>1.50</b>                          |                                                                |
| 14                    |                      |                      |         |                                  | 1.00            | 2.14                                  | 39.9%                                                           | 1.70                                 | 13.3%                                                          |
| 15                    | 8.70                 | 13.0                 | 0.44    | 0.80                             | 0.00            | <b>1.07</b>                           |                                                                 | <b>1.06</b>                          |                                                                |
| 16                    |                      |                      |         |                                  | 1.00            | 1.32                                  | 23.4%                                                           | 1.21                                 | 14.2%                                                          |
| 17                    | 8.70                 | 13.0                 | 0.74    | 0.80                             | 0.00            | <b>1.34</b>                           |                                                                 | <b>1.11</b>                          |                                                                |
| 18                    |                      |                      |         |                                  | 1.00            | 1.24                                  | -7.5%                                                           | 1.40                                 | 26.1%                                                          |
| 19                    | 8.70                 | 13.0                 | 0.98    | 0.80                             | 0.00            | <b>1.28</b>                           |                                                                 | <b>1.12</b>                          |                                                                |
| 20                    |                      |                      |         |                                  | 1.00            | 1.47                                  | 14.8%                                                           | 1.30                                 | 16.1%                                                          |
| 21                    | 10.0                 | 14.0                 | 0.44    | 0.80                             | 0.00            | <b>1.54</b>                           |                                                                 | <b>1.33</b>                          |                                                                |
| 22                    |                      |                      |         |                                  | 1.00            | 1.87                                  | 21.4%                                                           | 1.45                                 | 9.0%                                                           |
| 23                    | 10.0                 | 14.0                 | 0.74    | 0.80                             | 0.00            | <b>1.48</b>                           |                                                                 | <b>1.18</b>                          |                                                                |
| 24                    |                      |                      |         |                                  | 1.00            | 1.59                                  | 7.4%                                                            | 1.64                                 | 39.0%                                                          |
| 25                    | 11.0                 | 15.0                 | 0.44    | 0.80                             | 0.00            | <b>1.63</b>                           |                                                                 | <b>1.40</b>                          |                                                                |
| 26                    |                      |                      |         |                                  | 1.00            | 1.97                                  | 20.9%                                                           | 1.77                                 | 26.4%                                                          |
| 27                    | 11.0                 | 15.0                 | 0.74    | 0.80                             | 0.00            | <b>1.68</b>                           |                                                                 | <b>1.77</b>                          |                                                                |
| 28                    |                      |                      |         |                                  | 1.00            | 1.92                                  | 14.3%                                                           | 1.66                                 | -6.2%                                                          |
|                       |                      |                      |         |                                  |                 | Mean                                  | 20.1%                                                           | Mean                                 | 17.3%                                                          |
|                       |                      |                      |         |                                  |                 | SD                                    | 14.9%                                                           | SD                                   | 14.8%                                                          |

SWH<sub>o</sub>: significant wave height at outer ocean

SWP<sub>o</sub>: significant wave period at outer ocean

SLR: sea level rise, based on RCP scenarios 2.6 and 8.5 (Church et al., 2013).

MSL: mean sea level

SWH<sub>r</sub>: significant wave height at reef flat

\* The value is relative to a base value which is shown in bold

Table S2 Effects of intensification of tropical cyclones, and increased sea level rise and storm surges on water level at the shore at the study site.

| Case                                                  | SWH <sub>o</sub> (m) | SWP <sub>o</sub> (s) | SLR (m) | Tide relative to present MSL (m) | Storm surge (m) | WL <sub>s</sub> at degraded reef (m) | Effect of increasing of intensity of tropical cyclone to WL <sub>s</sub> at degraded reef (%)* | WLs at healthy reef (m) | Effect of increasing of intensity of tropical cyclone to WL <sub>s</sub> at healthy reef (%)* |
|-------------------------------------------------------|----------------------|----------------------|---------|----------------------------------|-----------------|--------------------------------------|------------------------------------------------------------------------------------------------|-------------------------|-----------------------------------------------------------------------------------------------|
| Effect of increasing of intensity of tropical cyclone |                      |                      |         |                                  |                 |                                      |                                                                                                |                         |                                                                                               |
| 32                                                    | 8.70                 | 13.0                 | 0.24    | 0.80                             | 0.00            | <b>1.19</b>                          |                                                                                                | <b>1.24</b>             |                                                                                               |
| 36                                                    | 10.0                 | 14.0                 |         |                                  |                 | 1.58                                 | 32.8%                                                                                          | 1.55                    | 25.0%                                                                                         |
| 40                                                    | 11.0                 | 15.0                 |         |                                  |                 | 1.87                                 | 57.1%                                                                                          | 1.90                    | 53.2%                                                                                         |
| 33                                                    | 8.70                 | 13.0                 | 0.24    | 0.80                             | 1.00            | <b>2.30</b>                          |                                                                                                | <b>2.29</b>             |                                                                                               |
| 37                                                    | 10.0                 | 14.0                 |         |                                  |                 | 2.44                                 | 6.1%                                                                                           | 2.53                    | 10.5%                                                                                         |
| 41                                                    | 11.0                 | 15.0                 |         |                                  |                 | 2.87                                 | 24.8%                                                                                          | 2.86                    | 24.9%                                                                                         |
| 34                                                    | 8.70                 | 13.0                 | 0.30    | 0.80                             | 0.00            | <b>1.30</b>                          |                                                                                                | <b>1.41</b>             |                                                                                               |
| 38                                                    | 10.0                 | 14.0                 |         |                                  |                 | 1.54                                 | 18.5%                                                                                          | 1.64                    | 16.3%                                                                                         |
| 42                                                    | 11.0                 | 15.0                 |         |                                  |                 | 1.97                                 | 51.5%                                                                                          | 1.99                    | 41.1%                                                                                         |
| 35                                                    | 8.70                 | 13.0                 | 0.30    | 0.80                             | 1.00            | <b>2.42</b>                          |                                                                                                | <b>2.35</b>             |                                                                                               |
| 39                                                    | 10.0                 | 14.0                 |         |                                  |                 | 2.55                                 | 5.4%                                                                                           | 2.54                    | 8.1%                                                                                          |
| 43                                                    | 11.0                 | 15.0                 |         |                                  |                 | 2.89                                 | 19.4%                                                                                          | 2.89                    | 23.0%                                                                                         |
| 44                                                    | 8.70                 | 13.0                 | 0.44    | 0.80                             | 0.00            | <b>1.50</b>                          |                                                                                                | <b>1.52</b>             |                                                                                               |
| 50                                                    | 10.0                 | 14.0                 |         |                                  |                 | 1.82                                 | 21.3%                                                                                          | 1.81                    | 19.1%                                                                                         |
| 54                                                    | 11.0                 | 15.0                 |         |                                  |                 | 2.07                                 | 38.0%                                                                                          | 2.12                    | 39.5%                                                                                         |
| 45                                                    | 8.70                 | 13.0                 | 0.44    | 0.80                             | 1.00            | <b>2.49</b>                          |                                                                                                | <b>2.50</b>             |                                                                                               |
| 51                                                    | 10.0                 | 14.0                 |         |                                  |                 | 2.70                                 | 8.4%                                                                                           | 2.69                    | 7.6%                                                                                          |
| 55                                                    | 11.0                 | 15.0                 |         |                                  |                 | 3.00                                 | 20.5%                                                                                          | 2.98                    | 19.2%                                                                                         |
| 46                                                    | 8.70                 | 13.0                 | 0.74    | 0.80                             | 0.00            | <b>1.82</b>                          |                                                                                                | <b>1.90</b>             |                                                                                               |
| 52                                                    | 10.0                 | 14.0                 |         |                                  |                 | 2.09                                 | 14.8%                                                                                          | 2.07                    | 8.9%                                                                                          |
| 56                                                    | 11.0                 | 15.0                 |         |                                  |                 | 2.41                                 | 32.4%                                                                                          | 2.45                    | 28.9%                                                                                         |
| 47                                                    | 8.70                 | 13.0                 | 0.74    | 0.80                             | 1.00            | <b>2.81</b>                          |                                                                                                | <b>2.83</b>             |                                                                                               |
| 53                                                    | 10.0                 | 14.0                 |         |                                  |                 | 2.97                                 | 5.7%                                                                                           | 2.96                    | 4.6%                                                                                          |
| 57                                                    | 11.0                 | 15.0                 |         |                                  |                 | 3.23                                 | 14.9%                                                                                          | 3.32                    | 17.3%                                                                                         |
| 49                                                    | 8.70                 | 13.0                 | 0.98    | 0.80                             | 1.00            | <b>3.00</b>                          |                                                                                                | <b>3.01</b>             |                                                                                               |
| 58                                                    | 11.0                 | 15.0                 |         |                                  |                 | 3.45                                 | 15.0%                                                                                          | 3.51                    | 16.6%                                                                                         |
|                                                       |                      |                      |         |                                  |                 | Mean                                 | 22.7%                                                                                          | Mean                    | 21.4%                                                                                         |
|                                                       |                      |                      |         |                                  |                 | SD                                   | 15.3%                                                                                          | SD                      | 13.3%                                                                                         |
| Effect of sea level rise                              |                      |                      |         |                                  |                 |                                      |                                                                                                |                         |                                                                                               |
| 30                                                    | 8.70                 | 13.0                 | 0.00    | 0.80                             | 0.00            | -                                    |                                                                                                | <b>0.86</b>             |                                                                                               |
| 32                                                    |                      |                      | 0.24    |                                  |                 | <b>1.19</b>                          |                                                                                                | 1.24                    | 44.2%                                                                                         |
| 34                                                    |                      |                      | 0.30    |                                  |                 | 1.30                                 | 9.2%                                                                                           | 1.41                    | 64.0%                                                                                         |
| 44                                                    |                      |                      | 0.44    |                                  |                 | 1.50                                 | 26.1%                                                                                          | 1.52                    | 76.7%                                                                                         |
| 46                                                    |                      |                      | 0.74    |                                  |                 | 1.82                                 | 52.9%                                                                                          | 1.90                    | 120.9%                                                                                        |
| 48                                                    |                      |                      | 0.98    |                                  |                 | 2.06                                 | 73.1%                                                                                          | 2.12                    | 146.5%                                                                                        |
| 31                                                    | 8.70                 | 13.0                 | 0.00    | 0.80                             | 1.00            | -                                    |                                                                                                | <b>2.10</b>             |                                                                                               |
| 33                                                    |                      |                      | 0.24    |                                  |                 | <b>2.30</b>                          |                                                                                                | 2.29                    | 9.0%                                                                                          |
| 35                                                    |                      |                      | 0.30    |                                  |                 | 2.42                                 | 5.2%                                                                                           | 2.35                    | 11.9%                                                                                         |
| 45                                                    |                      |                      | 0.44    |                                  |                 | 2.49                                 | 8.3%                                                                                           | 2.50                    | 19.0%                                                                                         |
| 47                                                    |                      |                      | 0.74    |                                  |                 | 2.81                                 | 22.2%                                                                                          | 2.83                    | 34.8%                                                                                         |
| 49                                                    |                      |                      | 0.98    |                                  |                 | 3.00                                 | 30.4%                                                                                          | 3.01                    | 43.3%                                                                                         |
| 36                                                    | 10.0                 | 14.0                 | 0.24    | 0.80                             | 0.00            | <b>1.58</b>                          |                                                                                                | <b>1.55</b>             |                                                                                               |
| 38                                                    |                      |                      | 0.30    |                                  |                 | 1.54                                 | -2.5%                                                                                          | 1.64                    | 5.8%                                                                                          |
| 50                                                    |                      |                      | 0.44    |                                  |                 | 1.82                                 | 15.2%                                                                                          | 1.81                    | 16.8%                                                                                         |

|    |      |      |      |      |      |             |       |             |       |
|----|------|------|------|------|------|-------------|-------|-------------|-------|
| 52 |      |      | 0.74 |      |      | 2.09        | 32.3% | 2.07        | 33.5% |
| 37 | 10.0 | 14.0 | 0.24 | 0.80 | 1.00 | <b>2.44</b> |       | <b>2.53</b> |       |
| 39 |      |      | 0.30 |      |      | 2.55        | 4.5%  | 2.54        | 0.4%  |
| 51 |      |      | 0.44 |      |      | 2.70        | 10.7% | 2.69        | 6.3%  |
| 53 |      |      | 0.74 |      |      | 2.97        | 21.7% | 2.96        | 17.0% |
| 40 | 11.0 | 15.0 | 0.24 | 0.80 | 0.00 | <b>1.87</b> |       | <b>1.90</b> |       |
| 42 |      |      | 0.30 |      |      | 1.97        | 5.3%  | 1.99        | 4.7%  |
| 54 |      |      | 0.44 |      |      | 2.07        | 10.7% | 2.12        | 11.6% |
| 56 |      |      | 0.74 |      |      | 2.41        | 28.9% | 2.45        | 28.9% |
| 41 | 11.0 | 15.0 | 0.24 | 0.80 | 1.00 | <b>2.87</b> |       | <b>2.86</b> |       |
| 43 |      |      | 0.30 |      |      | 2.89        | 0.7%  | 2.89        | 1.0%  |
| 55 |      |      | 0.44 |      |      | 3.00        | 4.5%  | 2.98        | 4.2%  |
| 57 |      |      | 0.74 |      |      | 3.23        | 12.5% | 3.32        | 16.1% |
| 58 |      |      | 0.98 |      |      | 3.45        | 20.2% | 3.51        | 22.7% |
|    |      |      |      |      |      | Mean        | 18.7% | Mean        | 32.2% |
|    |      |      |      |      |      | SD          | 18.1% | SD          | 37.8% |

| Case                  | SWH <sub>o</sub> (m) | SWP <sub>o</sub> (s) | SLR (m) | Tide relative to present MSL (m) | Storm surge (m) | WL <sub>s</sub> at degraded reef (m) | Effect of storm surge to WL <sub>s</sub> at degraded reef (%)* | WLs at healthy reef (m) | Effect of storm surge to WL <sub>s</sub> at healthy reef (%)* |
|-----------------------|----------------------|----------------------|---------|----------------------------------|-----------------|--------------------------------------|----------------------------------------------------------------|-------------------------|---------------------------------------------------------------|
| Effect of storm surge |                      |                      |         |                                  |                 |                                      |                                                                |                         |                                                               |
| 30                    | 8.70                 | 13.0                 | 0.00    | 0.80                             | 0.00            | -                                    |                                                                | <b>0.86</b>             |                                                               |
| 31                    |                      |                      |         |                                  | 1.00            | -                                    |                                                                | 2.10                    | 144.2%                                                        |
| 32                    | 8.70                 | 13.0                 | 0.24    | 0.80                             | 0.00            | <b>1.19</b>                          |                                                                | <b>1.24</b>             |                                                               |
| 33                    |                      |                      |         |                                  | 1.00            | 2.30                                 | 93.3%                                                          | 2.29                    | 84.7%                                                         |
| 34                    | 8.70                 | 13.0                 | 0.30    | 0.80                             | 0.00            | <b>1.30</b>                          |                                                                | <b>1.41</b>             |                                                               |
| 35                    |                      |                      |         |                                  | 1.00            | 2.42                                 | 86.2%                                                          | 2.35                    | 66.7%                                                         |
| 36                    | 10.0                 | 14.0                 | 0.24    | 0.80                             | 0.00            | <b>1.58</b>                          |                                                                | <b>1.55</b>             |                                                               |
| 37                    |                      |                      |         |                                  | 1.00            | 2.44                                 | 54.4%                                                          | 2.53                    | 63.2%                                                         |
| 38                    | 10.0                 | 14.0                 | 0.30    | 0.80                             | 0.00            | <b>1.54</b>                          |                                                                | <b>1.64</b>             |                                                               |
| 39                    |                      |                      |         |                                  | 1.00            | 2.55                                 | 65.6%                                                          | 2.54                    | 54.9%                                                         |
| 40                    | 11.0                 | 15.0                 | 0.24    | 0.80                             | 0.00            | <b>1.87</b>                          |                                                                | <b>1.90</b>             |                                                               |
| 41                    |                      |                      |         |                                  | 1.00            | 2.87                                 | 53.5%                                                          | 2.86                    | 50.5%                                                         |
| 42                    | 11.0                 | 15.0                 | 0.30    | 0.80                             | 0.00            | <b>1.97</b>                          |                                                                | <b>1.99</b>             |                                                               |
| 43                    |                      |                      |         |                                  | 1.00            | 2.89                                 | 46.7%                                                          | 2.89                    | 45.2%                                                         |
| 44                    | 8.70                 | 13.0                 | 0.44    | 0.80                             | 0.00            | <b>1.50</b>                          |                                                                | <b>1.52</b>             |                                                               |
| 45                    |                      |                      |         |                                  | 1.00            | 2.49                                 | 66.0%                                                          | 2.50                    | 64.5%                                                         |
| 46                    | 8.70                 | 13.0                 | 0.74    | 0.80                             | 0.00            | <b>1.82</b>                          |                                                                | <b>1.90</b>             |                                                               |
| 47                    |                      |                      |         |                                  | 1.00            | 2.81                                 | 54.4%                                                          | 2.83                    | 48.9%                                                         |
| 48                    | 8.70                 | 13.0                 | 0.98    | 0.80                             | 0.00            | <b>2.06</b>                          |                                                                | <b>2.12</b>             |                                                               |
| 49                    |                      |                      |         |                                  | 1.00            | 3.00                                 | 45.6%                                                          | 3.01                    | 42.0%                                                         |
| 50                    | 10.0                 | 14.0                 | 0.44    | 0.80                             | 0.00            | <b>1.82</b>                          |                                                                | <b>1.81</b>             |                                                               |
| 51                    |                      |                      |         |                                  | 1.00            | 2.70                                 | 48.4%                                                          | 2.69                    | 48.6%                                                         |
| 52                    | 10.0                 | 14.0                 | 0.74    | 0.80                             | 0.00            | <b>2.09</b>                          |                                                                | <b>2.07</b>             |                                                               |
| 53                    |                      |                      |         |                                  | 1.00            | 2.97                                 | 42.1%                                                          | 2.96                    | 43.0%                                                         |
| 54                    | 11.0                 | 15.0                 | 0.44    | 0.80                             | 0.00            | <b>2.07</b>                          |                                                                | <b>2.12</b>             |                                                               |
| 55                    |                      |                      |         |                                  | 1.00            | 3.00                                 | 44.9%                                                          | 2.98                    | 40.6%                                                         |
| 56                    | 11.0                 | 15.0                 | 0.74    | 0.80                             | 0.00            | <b>2.41</b>                          |                                                                | <b>2.45</b>             |                                                               |
| 57                    |                      |                      |         |                                  | 1.00            | 3.23                                 | 34.0%                                                          | 3.32                    | 35.5%                                                         |
|                       |                      |                      |         |                                  |                 | Mean                                 | 56.5%                                                          | Mean                    | 59.5%                                                         |
|                       |                      |                      |         |                                  |                 | SD                                   | 17.2%                                                          | SD                      | 27.7%                                                         |

SWH<sub>o</sub>: significant wave height at outer ocean

SWP<sub>o</sub>: significant wave period at outer ocean

SLR: sea level rise, based on RCP scenarios 2.6 and 8.5 (Church et al., 2013).

MSL: mean sea level

SWH<sub>r</sub>: significant wave height at reef flat

\* The value is relative to a base value which is shown in bold
